# Supplementary material for: Magnetic and magneto-optical properties of nickel hexacyanoferrate/chromate thin films
Source: Royal Society of Chemistry journal article supplement (doi:10.1039/c6ra25775e), 2017-01-01
Supplement: c6ra25775e1.pdf [file c6ra25775e1.pdf]

## Magnetic and magneto- optical properties of nickel hexacyanoferrate/chromate thin films

Magdalena Fitta<sup>1</sup>, Helena Prima-Garcia<sup>2</sup>, Paweł Czaja<sup>3</sup>, Tomasz Korzeniak<sup>4</sup>, Michał Krupiński<sup>1</sup>, Marcin Wojtyniak<sup>5,6</sup> and Maria Bałanda<sup>1</sup>

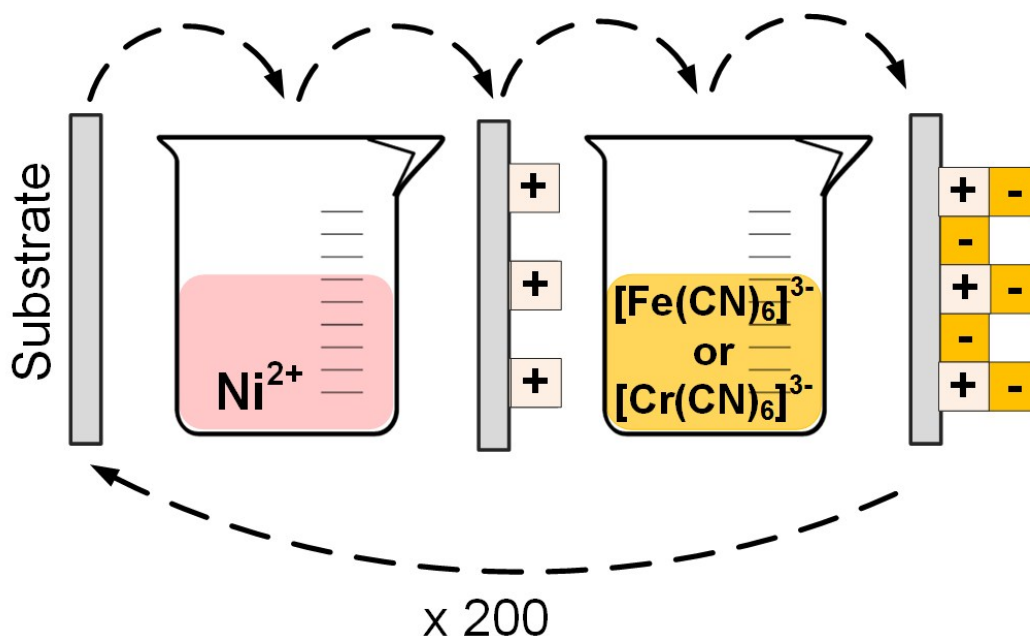

Figure S1. The scheme of “layer by layer” deposition of sample 1 and 3. Samples were obtained by means of multiple adsorption technique, where solid support was immersing in aqueous solution containing cations and then in aqueous solution containing anions. This sequence was repeated 200 times. The films’ grow is illustrated with simplified molecular building blocks.

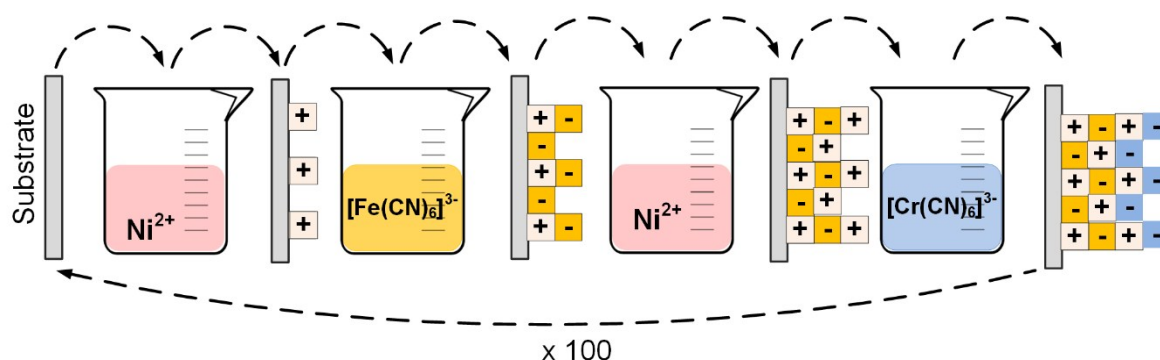

Figure S1. The scheme of “layer by layer” deposition of sample 2 (Ni(Fe/Cr)). Here the solid support was immersing in aqueous solution containing  $\text{Ni}^{2+}$  cations then in aqueous solution containing  $[\text{Fe}(\text{CN})_6]^{3-}$  anions and again in in aqueous solution containing  $\text{Ni}^{2+}$  cations and finally in aqueous solution containing  $[\text{Cr}(\text{CN})_6]^{3-}$  anions . This sequence was repeated 100 times.

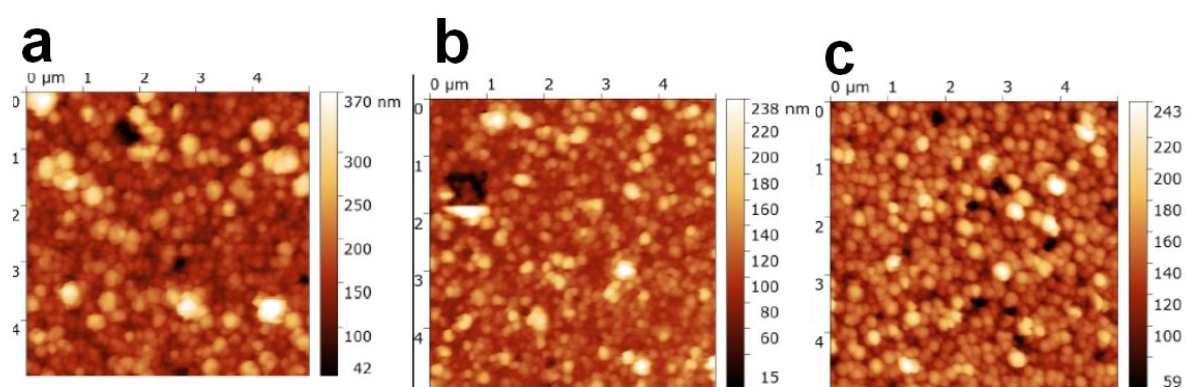

Figure S3. AFM images of sample 1 (a, 200 deposition cycles), 2 (b, 100 deposition cycles) and 3 (c, 200 deposition cycles).
